# Supplementary material for: Experience of “One Stop TB Diagnostic Solution” Model in Engaging a Private Laboratory for End-to-End Diagnostic Services in the National TB Elimination Program in Hisar, India
Source: MDPI journal article supplement (doi:10.3390/diagnostics13172823), 2023-08-31
Supplement: s1 [file s1]

**Supplementary Table S4.** Rifampicin Indeterminant Specimens completing Diagnostic Algorithm

| Rifampicin Indeterminant TB Patients |                                                                             | One-Stop TB Model                        |            |
|--------------------------------------|-----------------------------------------------------------------------------|------------------------------------------|------------|
| sl no                                | Particulars                                                                 | Number                                   | Percentage |
| 1                                    | Number of RI-TB patients diagnosed at Xpert Lab                             | 22                                       |            |
| 2                                    | Number whose samples reached the reference lab                              | 22                                       |            |
| i                                    | FL-LPA done                                                                 | 16                                       | 100%       |
| ii                                   | H and R Sensitive                                                           | 10                                       | 63%        |
| iii                                  | R Resistant                                                                 | 0                                        | 0%         |
| iv                                   | H and R Resistant                                                           | 6                                        | 37%        |
| 3                                    | FL-LPA not done                                                             | 1                                        | 5%         |
| 4                                    | Liquid Culture done                                                         | 22                                       | 100%       |
|                                      | Liquid Culture Positive (included into FL-LPA tests)                        | 16                                       | 73%        |
| 5                                    | SL- LPA done                                                                | 16                                       | 100%       |
| i                                    | FQ and SLI sensitive                                                        | 8                                        | 77%        |
| ii                                   | FQ and/ or SLI Resistant                                                    | 2                                        | 23%        |
| iii                                  | No results available                                                        | 0                                        | 0          |
| 6                                    | SL LPA Not done                                                             | 0                                        | 0%         |
| 7                                    | Liquid Culture DST done                                                     | 16                                       | 100%       |
| i                                    | Result for LC DST (Moxi, PZA, Lzd)                                          | Moxi (0/15)<br>Lzd (0/15)<br>PZA (1/15). |            |
| 8                                    | Number of Rifampicin Resistant patients completing the diagnostic algorithm | 21                                       | 95%        |

*Moxi – moxifloxacin, Lzd- Linezolid, PZA – pyrazinamide, H – Isoniazid, R – Rifampicin, FL LPA – First Line LPA, SL LPA – Second Line LPA, FQ – Fluroquinolone. RS – Rifampicin Sensitive. SLI – Second Line Injectable. LC – DST – Liquid Culture Drug susceptibility test.*
