# Supplementary material for: Experience of “One Stop TB Diagnostic Solution” Model in Engaging a Private Laboratory for End-to-End Diagnostic Services in the National TB Elimination Program in Hisar, India
Source: MDPI journal article supplement (doi:10.3390/diagnostics13172823), 2023-08-31
Supplement: s1 [file s1]

**Supplementary Table S1.** Comparative analysis of completing diagnostic algorithm for Rifampicin Sensitive Tuberculosis

| Rifampicin Sensitive (RS) TB Diagnostic Algorithm |                                                           | Uma Shankar S, et al 2021 (Year 2018) [12] |            | One-Stop TB Model (Year 2022)                  |            |
|---------------------------------------------------|-----------------------------------------------------------|--------------------------------------------|------------|------------------------------------------------|------------|
| sl no                                             | Particulars                                               | Number                                     | Percentage | Number                                         | Percentage |
| 1                                                 | Number of RS TB Patients diagnosed at Xpert Lab           | 1,590                                      |            | 1,996                                          |            |
| 2                                                 | Number of samples reached the reference lab               | 1,170                                      | 74%        | 1,996                                          | 100%       |
| 3                                                 | FL-LPA not done                                           | 39*                                        | 3%         | 0                                              |            |
| 4                                                 | FL-LPA not done                                           | 1131                                       | 97%        | 1,806**                                        | 90%        |
| i                                                 | H and R Sensitive                                         | 1,056                                      | 93%        | 1,692                                          | 94%        |
| ii                                                | H Resistant and R Sensitive                               | 51                                         | 5%         | 108                                            | 6%         |
| iii                                               | R Resistant only                                          | 3                                          | 1%         | 1                                              | <1%        |
| Iv                                                | H and R Resistant                                         |                                            |            | 5                                              | <1%        |
| iv                                                | No results                                                | 21                                         | 2%         | 0                                              |            |
| 5                                                 | SLLPA done                                                | 11                                         | 20%        | 114                                            | 100%       |
| 6                                                 | SL-LPA not done                                           | 43                                         | 80%        | 0                                              | 0          |
| i                                                 | FQ and SLI Sensitive                                      | 7                                          | 63%        | 99                                             | 87%        |
| ii                                                | FQ and/ or SLI Resistant                                  | 0                                          |            | 15                                             | 13%        |
| iii                                               | No results                                                | 4                                          |            | 0                                              | 0          |
| 7                                                 | Culture done                                              | 43                                         | 40%        | 114                                            | 100%       |
| 8                                                 | Result for LC DST (Moxi, PZA, Lzd)                        |                                            |            | Moxi (3/108),<br>Lzd (1/108),<br>PZA (14/108). |            |
| 9                                                 | Number of RS Patients completing the diagnostic algorithm | 1,106                                      | 95%        | 1985#                                          | 99%        |

\*Reasons not listed \*\*smear negative & culture-negative specimens excluded #11 insufficient samples did not complete sequential tests. Moxi – moxifloxacin, Lzd- Linezolid, PZA – pyrazinamide, H – Isoniazid, R – Rifampicin, FL-LPA – First Line LPA, SL-LPA – Second Line LPA, FQ – Fluroquinolone. RS – Rifampicin Sensitive. SLI – Second Line Injectable. LC – DST – Liquid Culture Drug susceptibility test.
