# Supplementary material for: Experience of “One Stop TB Diagnostic Solution” Model in Engaging a Private Laboratory for End-to-End Diagnostic Services in the National TB Elimination Program in Hisar, India
Source: MDPI journal article supplement (doi:10.3390/diagnostics13172823), 2023-08-31
Supplement: s1 [file s1]

**Supplementary Table S2** - Comparative analysis of completing diagnostic algorithm for Rifampicin Resistant Tuberculosis

| RR TB Diagnostic Algorithm |                                                              | Uma Shankar S, et al<br>2021 (Year 2018) [12] |            | One-Stop TB Model (Year<br>2022)             |            |
|----------------------------|--------------------------------------------------------------|-----------------------------------------------|------------|----------------------------------------------|------------|
| sl no                      | Particulars                                                  | Number                                        | Percentage | Number                                       | Percentage |
| 1                          | Number of RR-TB patients diagnosed at Xpert Lab              | 64                                            |            | 134                                          |            |
| 2                          | Number whose samples reached reference lab                   | 35                                            | 55%        | 134                                          |            |
| i                          | FL-LPA done                                                  | n.a                                           |            | 111                                          | 100%       |
| ii                         | FL-LPA not done                                              | n.a                                           |            | 2                                            | 1%         |
| iii                        | H and R Sensitive                                            | n.a                                           |            | 4                                            | 3%         |
| iv                         | R Resistant                                                  | n.a                                           |            | 26                                           | 23%        |
| v                          | H and R Resistant                                            | n.a                                           |            | 81                                           | 73%        |
| 3                          | SL-LPA done                                                  | 14                                            | 40%        | 107                                          | 96%        |
| 4                          | SL-LPA Not done                                              | 21                                            | 60%        | 2                                            | 2%         |
| i                          | FQ and SLI sensitive                                         | 9                                             | 64%        | 81                                           | 76%        |
| ii                         | FQ and SLI Resistant                                         | 2                                             | 15%        | 26                                           | 24%        |
| iii                        | No results available                                         | 3                                             | 21%        | 0                                            | 0          |
| 5                          | Culture done                                                 | 8                                             | 31%        | 107                                          | 100%       |
| i                          | Result for LC-DST (Moxi, PZA, Lzd)                           |                                               |            | Moxi (8/104)<br>Lzd (1/104)<br>PZA (26/104). |            |
| 6                          | Number of RR-TB patients completing the diagnostic algorithm | 17                                            | 49%        | 132                                          | 98%        |

Moxi – moxifloxacin, Lzd- Linezolid, PZA – pyrazinamide, H – Isoniazid, R – Rifampicin, FL LPA – First Line LPA, SL LPA – Second Line LPA, FQ – Fluroquinolone. RS – Rifampicin Sensitive. SLI – Second Line Injectable. LC – DST – Liquid Culture Drug susceptibility test.
