# Supplementary material for: Experience of “One Stop TB Diagnostic Solution” Model in Engaging a Private Laboratory for End-to-End Diagnostic Services in the National TB Elimination Program in Hisar, India
Source: MDPI journal article supplement (doi:10.3390/diagnostics13172823), 2023-08-31
Supplement: s1 [file s1]

**Medical Center Route Stops**

**X-ray Facilities**

- Within 5k and 10k of a Medical Center
- Within 10k of a Medical Center
- Not within 5k or 10k of a Medical Center

**Routes**

- PLAN 1 - 62 km
- PLAN 2 - 60 km
- PLAN 3 - 75 km
- PLAN 4 - 103 km
- Road Network
- Hisar Administrative Boundary
