# Supplementary material for: Experience of “One Stop TB Diagnostic Solution” Model in Engaging a Private Laboratory for End-to-End Diagnostic Services in the National TB Elimination Program in Hisar, India
Source: MDPI journal article supplement (doi:10.3390/diagnostics13172823), 2023-08-31

Supplement Figure 2 – F2 Schematic outline of implementation flow - One-Stop TB/DR-TB Diagnostic Solution model

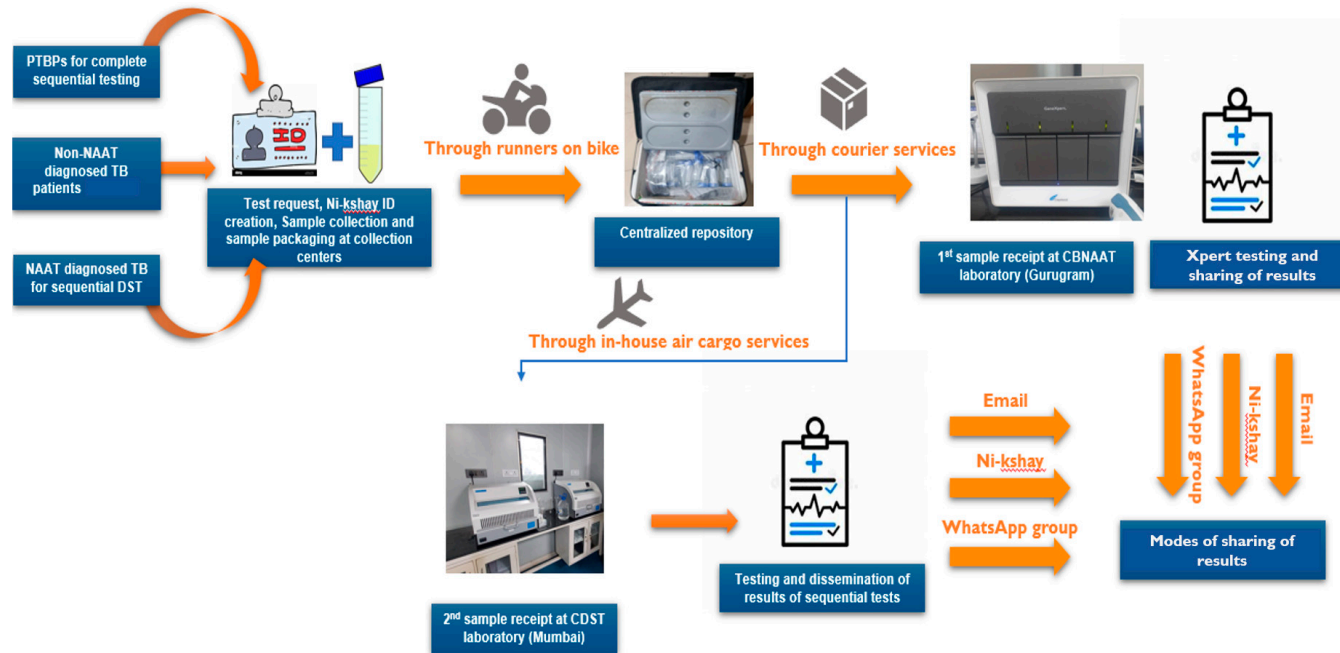

Supplement: s1 [file s1]
