# Supplementary material for: Experience of “One Stop TB Diagnostic Solution” Model in Engaging a Private Laboratory for End-to-End Diagnostic Services in the National TB Elimination Program in Hisar, India
Source: MDPI journal article supplement (doi:10.3390/diagnostics13172823), 2023-08-31
Supplement: s1 [file s1]

**Supplementary Table S3.** Comparative analysis for Turnaround Time as proposed in NTEP

| One-Stop<br>TB Model<br>(Year<br>2022)* | NTEP suggested TAT<br>(in days) |                                                                 |                  | Uma Shankar S.<br>et al 2021 [12] * | One-Stop TB Model (Year 2022)*<br>(in days) |                |                |
|-----------------------------------------|---------------------------------|-----------------------------------------------------------------|------------------|-------------------------------------|---------------------------------------------|----------------|----------------|
| Test Name                               | Pre-Lab<br>TAT                  | Lab TAT                                                         | Total<br>lab TAT | Total TAT                           | Pre-<br>Lab<br>TAT                          | Lab<br>TAT     | Total<br>TAT   |
| Xpert test                              | 1-2                             | 1-2                                                             | 2- 4             | 1 (1–2)                             | 1                                           | 1              | 1 (1-1)        |
| FL-LPA                                  | 1-3                             | 2-3                                                             | 3-6              | 5 (4–6)                             | n.a                                         | 4 (3-5)        | 4 (3-5)        |
| SL – LPA                                |                                 |                                                                 |                  | 16(8-30)                            | n.a                                         | 2.5 (1-4)      | 2.5 (1-4)      |
|                                         |                                 | 5-7 (LPA)<br>22-48 (LC<br>DST)<br>(in most<br>cases 30<br>days) | 27-55            |                                     |                                             |                |                |
| LC DST                                  | n.a                             |                                                                 |                  | n.a                                 | n.a                                         | 22 (17-<br>32) | 22 (17-<br>32) |

*n.a - not available \* median and interquartile range (IQR)*
